# Supplementary material
Source: publisher figshare collection journal article supplement (https://frontiersin.figshare.com/ndownloader/files/14634959)
Supplement: Supplementary file 1 [file 14634959]

bout\_no: the id of the calling bout (1-57)

time: the time of the observation (format: YYYY-MM-DD HH:MM:SS)

id: the identity of the individual (1-16)

lon: the longitudinal coordinate of the individual

lat: the latitudinal coordinate of the individual

call: whether a call was produced by a given individual at a given time (N = no, Y = yes)

reltime: the number of seconds relative to the time of the first call in the bout (from -1200 to 1200, first call occurs at reltime = 0)

bad\_int: whether or not a given time point overlaps with an interval of group split or herding event (N = no, Y = yes)
